# Supplementary material for: Efficient methane oxidation to oxygenates over etched ZnCr layered double hydroxide nanosheets
Source: Royal Society of Chemistry journal article supplement (doi:10.1039/d3ta03472k), 2023-01-01
Supplement: d3ta03472k1.pdf [file d3ta03472k1.pdf]

## Supporting Information

### **Efficient methane oxidation to oxygenates over etched ZnCr layered double hydroxide nanosheets**

*Lei Wu,<sup>‡</sup> Dandan Liu,<sup>‡</sup> Fan Chen, Huanyu Zhou, Rui Shi, Yana Liu, Jiguang Zhang, Yunfeng Zhu and Jun Wang\**

College of Materials Science and Engineering, Jiangsu Collaborative Innovation Centre for Advanced Inorganic Function Composites, Nanjing Tech University, 30 South Puzhu Road, Nanjing, 211816, P. R. China

## 1. Experimental section

### 1.1. Materials

All reagents were used as received. Zinc nitrate hexahydrate ( $\text{Zn}(\text{NO}_3)_2 \cdot 6\text{H}_2\text{O}$ ), chromium(III) oxide ( $\text{Cr}_2\text{O}_3$ ) and 30% hydrogen peroxide aqueous solution ( $\text{H}_2\text{O}_2$ ) were purchased from Sinopharm Chemical Reagent Co., Ltd. Chromium(III) nitrate nonahydrate ( $\text{Cr}(\text{NO}_3)_3 \cdot 9\text{H}_2\text{O}$ ), sodium chromate tetrahydrate ( $\text{Na}_2\text{CrO}_4 \cdot 4\text{H}_2\text{O}$ ), chromium(VI) oxide ( $\text{CrO}_3$ ), sodium hydroxide ( $\text{NaOH}$ ), sodium carbonate ( $\text{Na}_2\text{CO}_3$ ), acetylacetone ( $\text{C}_5\text{H}_8\text{O}_2$ ), 5,5-Dimethyl-1-pyrroline N-oxide ( $\text{C}_6\text{H}_{11}\text{NO}$ ), zinc acetate dihydrate ( $\text{C}_4\text{H}_6\text{O}_4\text{Zn} \cdot 2\text{H}_2\text{O}$ ), oxalic acid ( $\text{C}_2\text{H}_2\text{O}_4$ ), deuterium oxide ( $\text{D}_2\text{O}$ , 99.9% D) and 1,4-dioxane ( $\text{C}_4\text{H}_8\text{O}_2$ ) were bought from Shanghai Aladdin Bio-Chem. Technology Co., Ltd.  $\text{CH}_4$  (99.999%) and Ar (99.999%) were obtained from the Nanjing Shangyuan Gas. The deionized water was utilized in all experiments, which has a resistivity of  $18.2 \text{ M}\Omega \cdot \text{cm}$ .

### 1.2. Synthesis of ZnCr-LDH nanosheets

For a typical experiment, 0.04 mol  $\text{Zn}(\text{NO}_3)_2 \cdot 6\text{H}_2\text{O}$  and 0.02 mol  $\text{Cr}(\text{NO}_3)_3 \cdot 9\text{H}_2\text{O}$  were first dissolved in 30 mL of deionized water. Then, 40 mL of aqueous solution containing 0.12 mol  $\text{NaOH}$  and 0.1 mol  $\text{Na}_2\text{CO}_3$  were added dropwise into the above solution under constant stirring. The slurry was further heated at  $60 \text{ }^\circ\text{C}$  in an oil bath for 24 h. Subsequently, the precipitates were collected by centrifugation and washed with deionized water for five times. Finally, the as-prepared ZnCr-LDH nanosheets were freeze-dried overnight.

### 1.3. Alkali etching of ZnCr-LDH nanosheets

First, 300 mg of ZnCr-LDH nanosheets was dispersed in 20 mL of deionized water and sonicated for 30 min. Then the suspension was mixed with 60 mL of aqueous solution containing 0.06 mol  $\text{NaOH}$ . After stirring for 10 minutes, the mixture was transferred to a Teflon-lined

autoclave and heated at 120 °C for various times. After cooling to room temperature, the product was collected by centrifugation and washed with deionized water for five times. Finally, the product was freeze-dried overnight to obtain etched ZnCr-LDH nanosheets.

#### **1.4. Synthesis of ZnO nanoparticles**

1.487 g of  $\text{Zn}(\text{NO}_3)_2 \cdot 6\text{H}_2\text{O}$  and 0.45 g of oxalic acid were dissolved in 100 mL of deionized water, respectively. The oxalic acid solution was then added into metal precursor solution to obtain the precipitates. Subsequently, the precipitates were filtered, washed with deionized water, and freeze-dried overnight. Finally, the solid powder was calcined at 350 °C in air for 6 h to obtain ZnO nanoparticles.

#### **1.5. Material characterization**

The crystal structures and crystallinity of the samples were analyzed by X-ray diffraction (XRD) with Cu  $K\alpha$  radiation (40 kV and 35 mA) using an ARL-X'TRA diffractometer. Transmission electron microscopy (TEM) images were carried out using JEM-2010 electron microscope. High-angle annular dark-field scanning transmission electron microscopy (HAADF-STEM) images, SAED and elemental mapping were performed using FEI Talos F200X G2 electron microscope. The field emission scanning electron microscopy (FE-SEM) images were performed to detect the morphology of the samples by using JSM-5900. X-ray photoelectron spectroscopy (XPS) was recorded in Thermo Scientific K-Alpha. The  $\text{Zn}^{2+}/\text{Cr}^{3+}$  molar ratios of ZnCr-LDH nanosheets were measured by inductively coupled plasma-optical emission spectrometry (ICP-OES, PerkinElmer Avio200). Brunauer-Emmett-Teller (BET) surface areas were collected by Nitrogen adsorption-desorption isotherms using Micromeritics ASAP 2460 at 77 K. Fourier transform infrared (FT-IR) spectra was carried out in a range of 4000-500  $\text{cm}^{-1}$  by Thermo Scientific Nicolet iS5. Raman spectra were recorded on LabRAM HR Evolution with a

diode laser emitting 532 nm. Low-temperature electron paramagnetic resonance (EPR) spectroscopy measurement was performed on Bruker EMX plus at 77 K to detect vacancies.

### **1.6. Detection of reactive radicals**

The reactive radicals were detected by EPR measurements at room temperature using a Bruker A200 EPR spectrometer, where 5,5-dimethyl-1-pyrroline N-Oxide (DMPO) was used as the trapping agent. Typically, for the detection of  $\cdot\text{OH}$  and  $\cdot\text{OOH}$  radicals, the sample (10 mg) was dispersed in a mixed solution containing water (5 mL) and  $\text{H}_2\text{O}_2$  solution (200  $\mu\text{L}$ , 30 wt % in  $\text{H}_2\text{O}$ ). Then, 200  $\mu\text{L}$  of the dispersion was mixed with 100  $\mu\text{L}$  of DMPO aqueous solution (300 mM), which was stirred for 1 min to capture the reactive radicals before the EPR measurements.

### **1.7. Catalytic activity measurements**

The methane oxidation reaction with  $\text{H}_2\text{O}_2$  was carried out in a 220 mL batch-reactor. Typically, 10 mg catalyst was dispersed in 50 mL deionized water by ultrasonication for 20 min.  $\text{H}_2\text{O}_2$  solution (0-2 mL, 30 wt % in  $\text{H}_2\text{O}$ ) was added into the above solution under stirring. After sealing, the batch-reactor was purged with Ar for 15 min to exhaust air and then pressurized with 20 bar methane, which was stirred for 10 more minutes to ensure the dissolution of methane in the reaction solution. Afterwards, the reactor was heated to 50  $^\circ\text{C}$  with constant stirring at 500 rpm. After 1h of the reaction, the reactor was cooled in an ice-water bath to reduce product volatilization.

### **1.8. Products analysis and quantification**

The liquid oxygenates products ( $\text{CH}_3\text{OH}$ ,  $\text{CH}_3\text{OOH}$ ,  $\text{HOCH}_2\text{OOH}$ ,  $\text{HCOOH}$ ) were quantified by nuclear magnetic resonance (Bruker AVANCE III 400 MHz). Typically, 0.5 mL liquid product was mixed with 0.1 mL  $\text{D}_2\text{O}$  containing 0.01% (v/v) 1, 4-Dioxane as the internal standard (Fig. S9). The water suppression technique was applied during the NMR measurements. The gas product

(CO<sub>2</sub>) was analyzed by gas chromatograph (GC 9790 PLUS, Zhejiang Fuli Analytical Instrument Co., Ltd) equipped with a thermal conductivity detector (TCD) and a flame ionization detector (FID).

Liquid product HCHO was quantified by the acetylacetone colorimetric method.<sup>1</sup> Typically, 25 g ammonium acetate was dissolved in 50 mL deionized water, then 3 mL acetic acid and 0.25 mL acetylacetone were added. Afterwards, the solution was diluted to 100 mL with deionized water. The obtained 0.25% (v/v) acetylacetone solution was stored at 2-5 °C before use. After catalytic reaction, 3 mL liquid product solution was mixed with 2 mL 0.25% (v/v) acetylacetone solution. The mixed solution was heated at 100 °C in an oil bath for 1.5 min, making HCHO react with acetylacetone and ammonia to form yellow-colored 3,5-diacetyl-1,4-dihydropyridine which can be measured by the absorbance at 413 nm with an ultraviolet-visible (UV-vis) spectrophotometer (TU-1901, Persee Inc.). To quantify the produced HCHO, the calibration curves were built using standard HCHO solutions (Fig. S10).

The H<sub>2</sub>O<sub>2</sub> conversion was quantitatively measured by a Ce<sup>4+</sup> titration method ( $2\text{Ce}^{4+} + \text{H}_2\text{O}_2 \rightarrow 2\text{Ce}^{3+} + 2\text{H}^+ + \text{O}_2$ ).<sup>2</sup> The Ce<sup>4+</sup> concentration-absorbance curve was plotted by linear fitting the absorbance at 319 nm for various known concentrations of 0, 0.1, 0.2, 0.3, and 0.4 mM of Ce<sup>4+</sup> (Fig. S12). The sample solutions were mixed with 0.4 mM Ce<sup>4+</sup> solution by specific dilution, and the absorbance at 319 nm was measured after 10 min. The concentration of H<sub>2</sub>O<sub>2</sub> was finally determined based on the reduced Ce<sup>4+</sup> concentration.

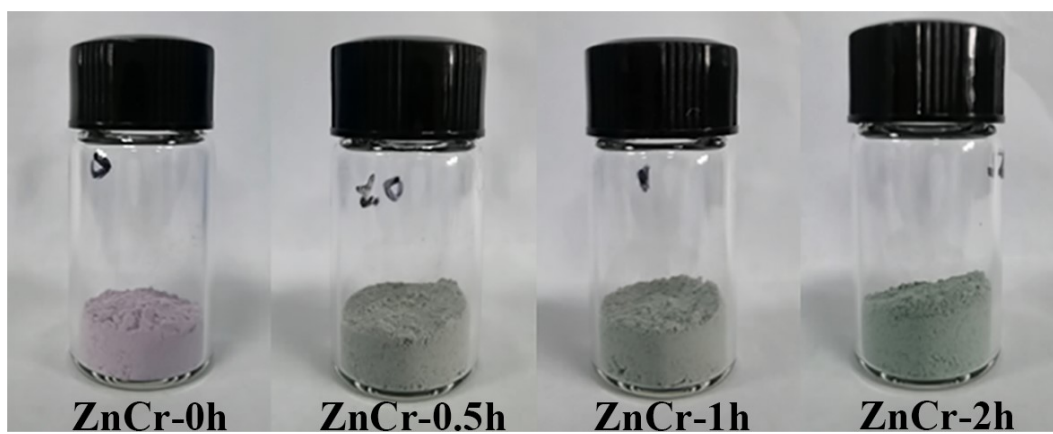

**Fig. S1.** Digital images of etched ZnCr-xh ( $x = 0, 0.5, 1$  and  $2$ ) nanosheets.

**Table S1.** ICP-OES measurements for ZnCr-xh (x= 0, 0.5, 1, 2) nanosheets.

| Sample           | Zn/Cr molar ratio |         | Etched metal content (wt%) |       | Residual Na content (wt%) |
|------------------|-------------------|---------|----------------------------|-------|---------------------------|
|                  | Nominal           | ICP-OES | Zn                         | Cr    |                           |
| <b>ZnCr-0h</b>   | 2:1               | 2.111:1 | /                          | /     | 0.094                     |
| <b>ZnCr-0.5h</b> | 2:1               | 1.764:1 | 5.918                      | 0.004 | 0.087                     |
| <b>ZnCr-1h</b>   | 2:1               | 1.644:1 | 7.099                      | 0.013 | 0.053                     |
| <b>ZnCr-2h</b>   | 2:1               | 1.478:1 | 9.544                      | 0.023 | 0.007                     |

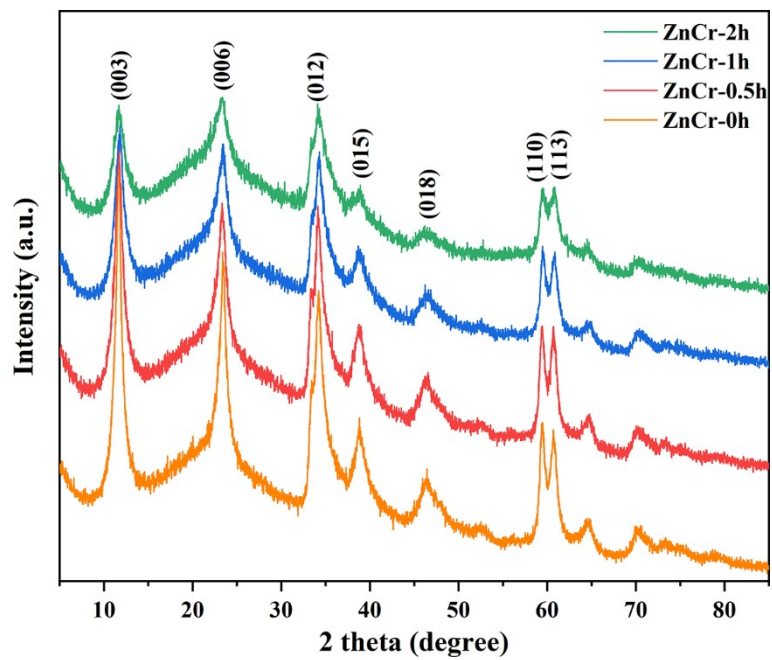

**Fig. S2.** XRD patterns of etched ZnCr-xh (x = 0, 0.5, 1 and 2) nanosheets.



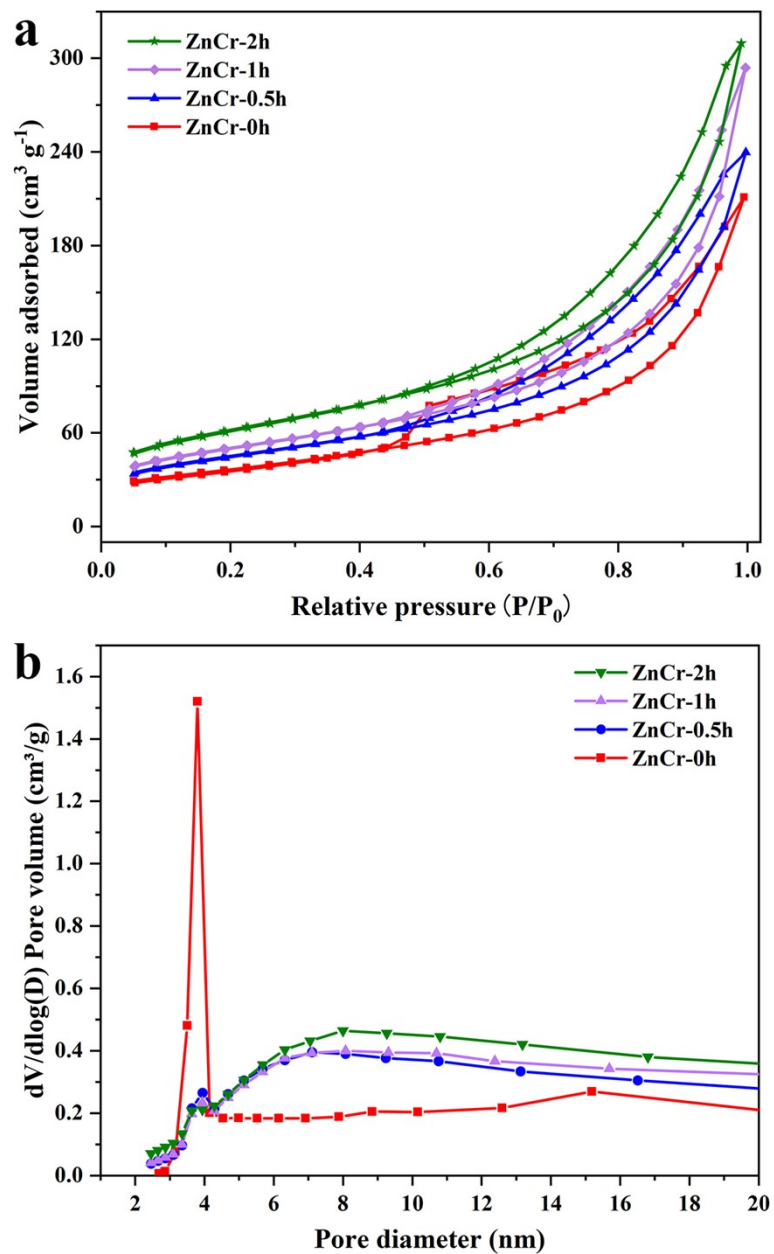

**Fig. S3.** (a) N<sub>2</sub> adsorption-desorption isotherms and (b) pore size distributions of ZnCr-xh (x = 0, 0.5, 1 and 2) nanosheets.

**Table S2.** BET surface area of ZnCr-xh (x = 0, 0.5, 1 and 2) nanosheets.

| <b>Sample</b>    | <b>BET surface area (m<sup>2</sup> g<sup>-1</sup>)</b> |
|------------------|--------------------------------------------------------|
| <b>ZnCr-0h</b>   | 126.1                                                  |
| <b>ZnCr-0.5h</b> | 153.1                                                  |
| <b>ZnCr-1h</b>   | 169.0                                                  |
| <b>ZnCr-2h</b>   | 207.0                                                  |

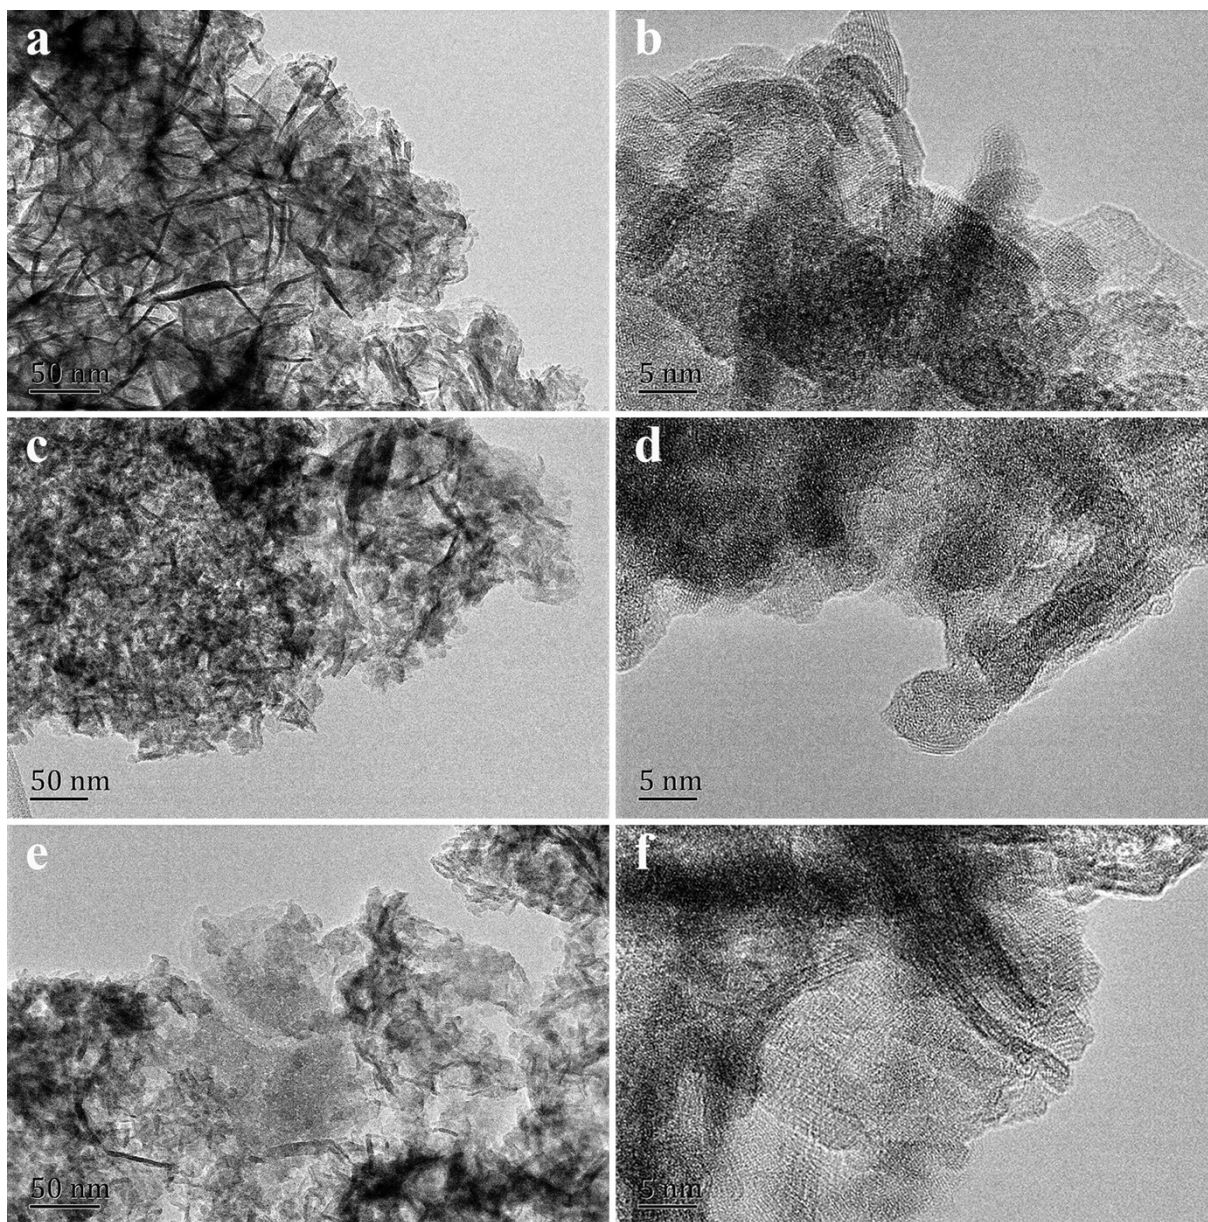

**Fig. S4.** TEM and HRTEM images of (a-b) ZnCr-0h, (c-d) ZnCr-0.5h, (e-f) ZnCr-2h nanosheets.

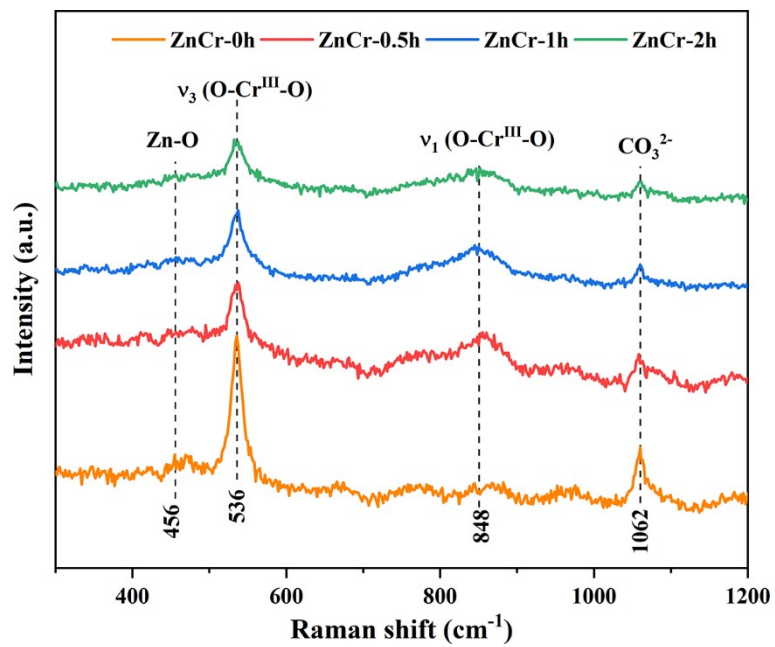

**Fig. S5.** Raman spectra of ZnCr-xh ( $x = 0, 0.5, 1$  and  $2$ ) nanosheets.

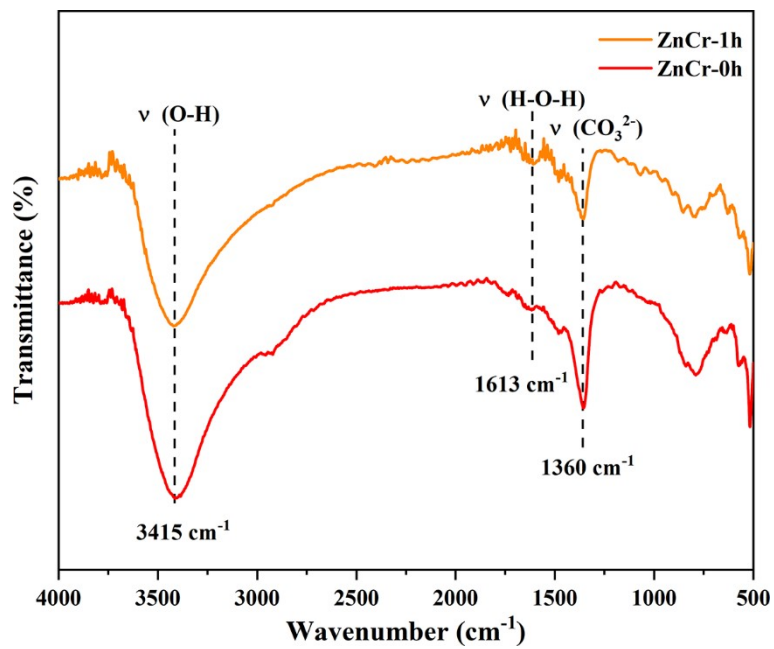

**Fig. S6.** Fourier-transform infrared spectrum of ZnCr-0h and ZnCr-1h nanosheets.

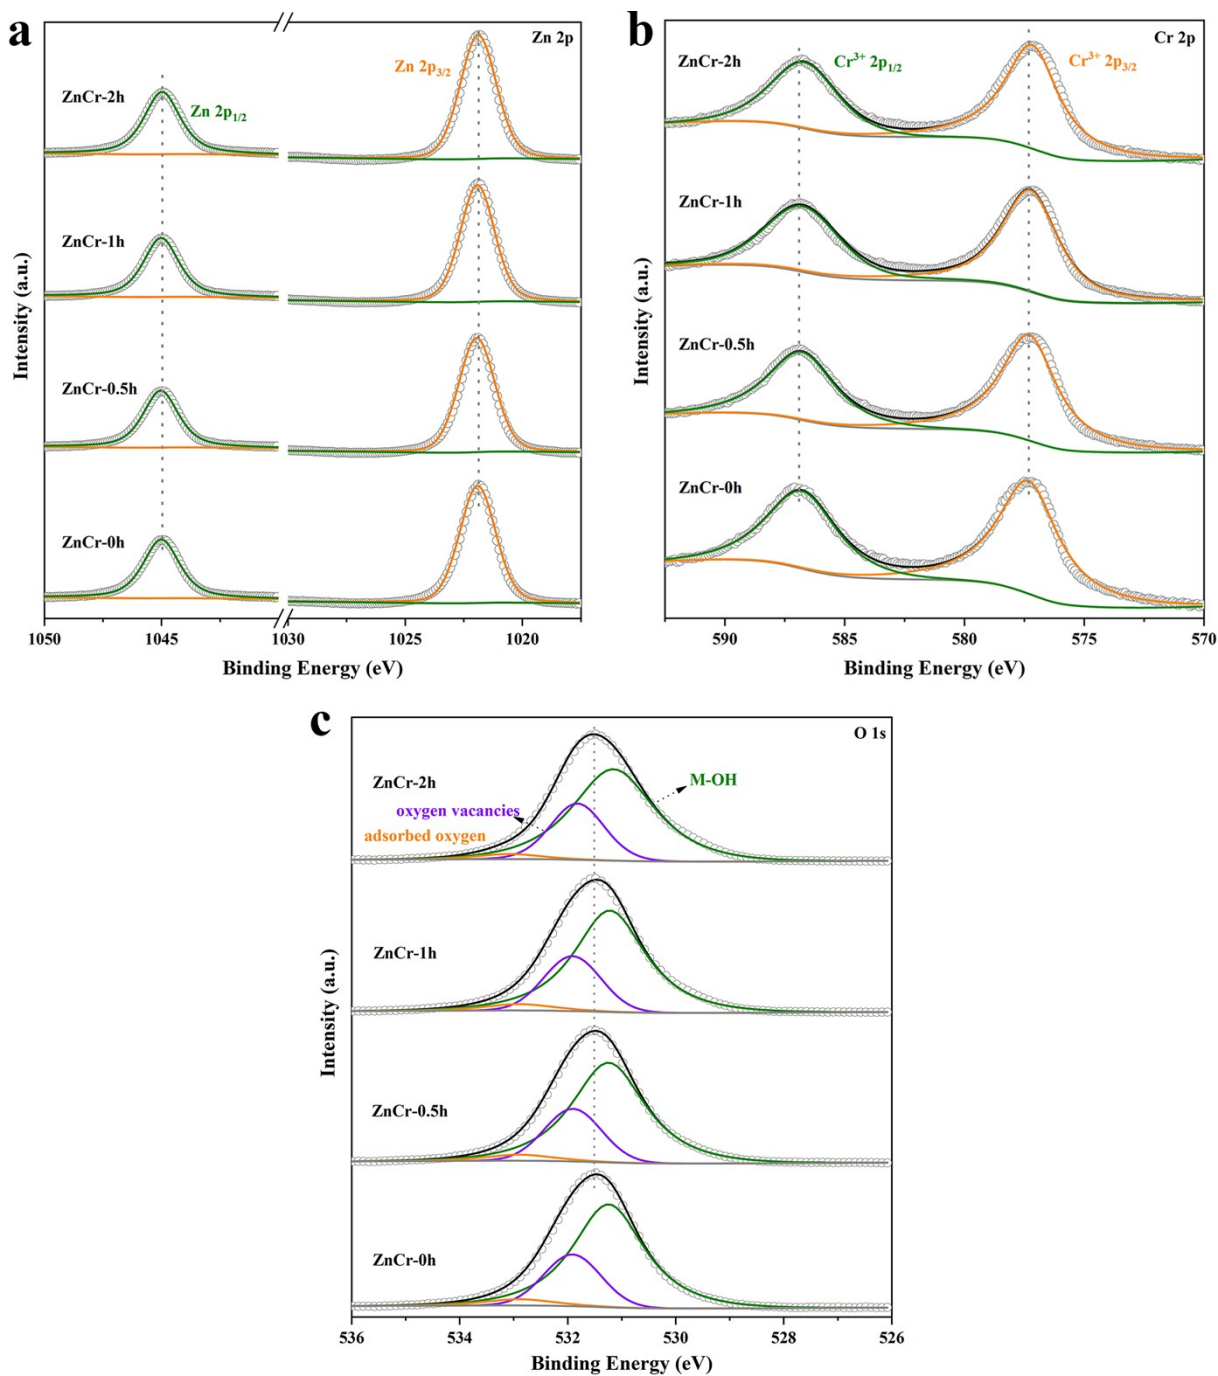

**Fig. S7.** High-resolution XPS spectra of (a) Zn 2p, (b) Cr 2p and (c) O 1s on ZnCr-xh (x = 0, 0.5, 1 and 2) nanosheets.

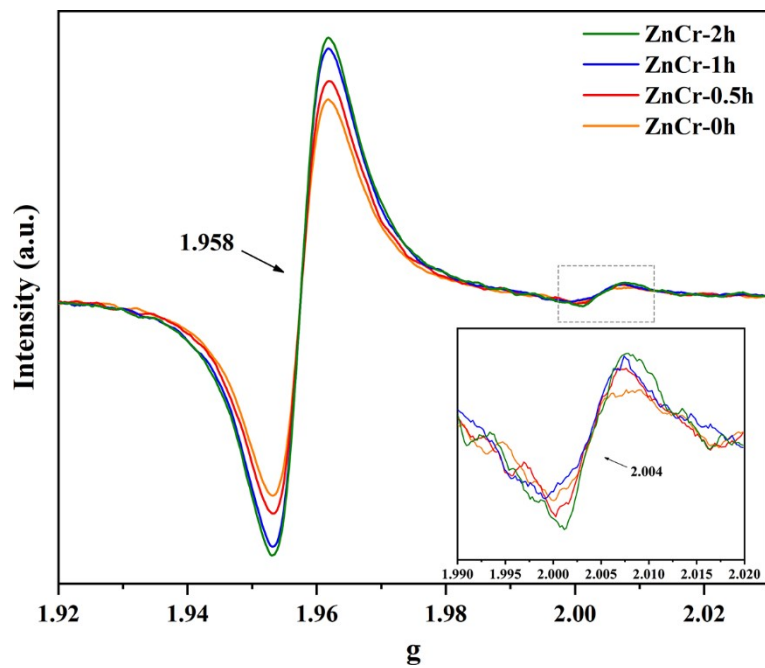

**Fig. S8.** EPR spectra of ZnCr-xh (x = 0, 0.5, 1 and 2) nanosheets.

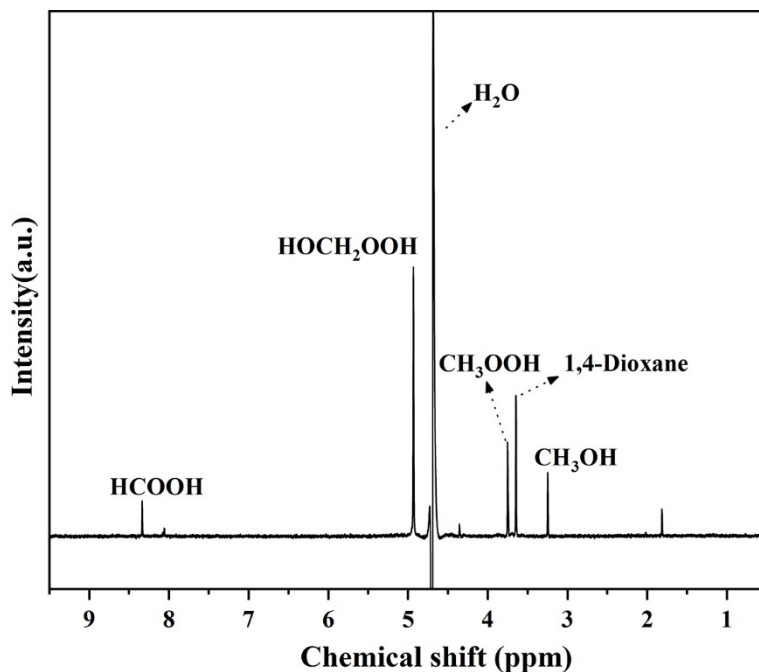

**Fig. S9.** Typical  $^1\text{H}$  NMR spectrum of reaction products from  $\text{CH}_4$  oxidation over the ZnCr-1h nanosheets for 1 h. Reaction conditions: 10 mg catalyst, 20 bar  $\text{CH}_4$ , 50 mL  $\text{H}_2\text{O}$ , 1 mL  $\text{H}_2\text{O}_2$  (30 wt% in  $\text{H}_2\text{O}$ ), 1 h reaction time, 50  $^\circ\text{C}$ . The chemical shifts of  $\text{CH}_3\text{OH}$ ,  $\text{CH}_3\text{OOH}$ ,  $\text{HOCH}_2\text{OOH}$  and  $\text{HCOOH}$  are located at 3.34, 3.84, 5.02 and 8.43 ppm, respectively. 1,4-dioxane with the chemical shift of 3.74 ppm is used as the internal standard.



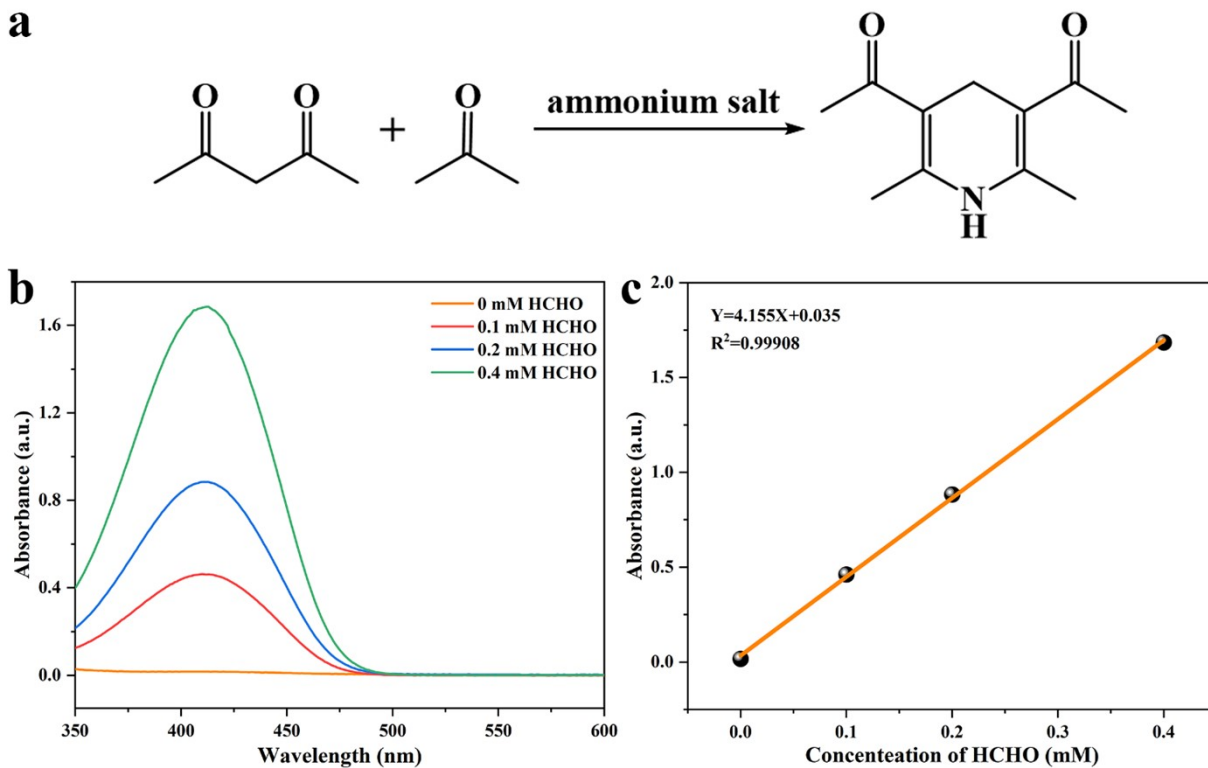

**Fig. S10.** (a) Reaction mechanism on acetylacetone colorimetric method to detect HCHO. (b) UV-vis absorption spectra of acetylacetone colorimetric method at different HCHO concentration. (c) Calibration curve of HCHO concentration with respect to UV-vis absorption intensity.

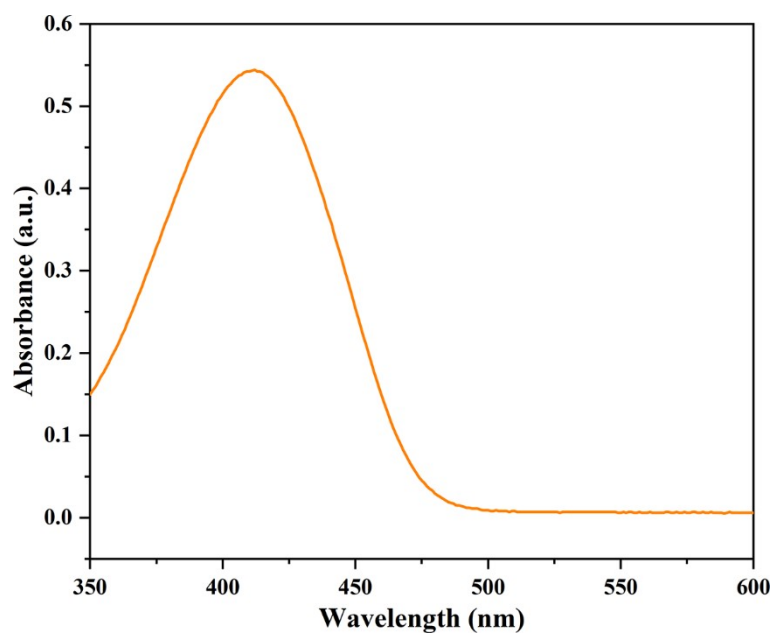

**Fig. S11.** Typical UV-vis absorption spectrum for quantifying the yield of HCHO over ZnCr-1h with acetylacetone colorimetric method. Reaction conditions: 10 mg catalyst, 20 bar CH<sub>4</sub>, 50 mL H<sub>2</sub>O, 1 mL H<sub>2</sub>O<sub>2</sub> (30 wt% in H<sub>2</sub>O), 1 h reaction time, 50 °C.

Since the concentration of the produced HCHO in the solution over ZnCr-1h exceeds the detection limit of the calibration curve in Fig. S10, the presented UV-vis absorption spectrum here is originated from the diluted solution (diluted 15 times with deionized water) after the reaction.

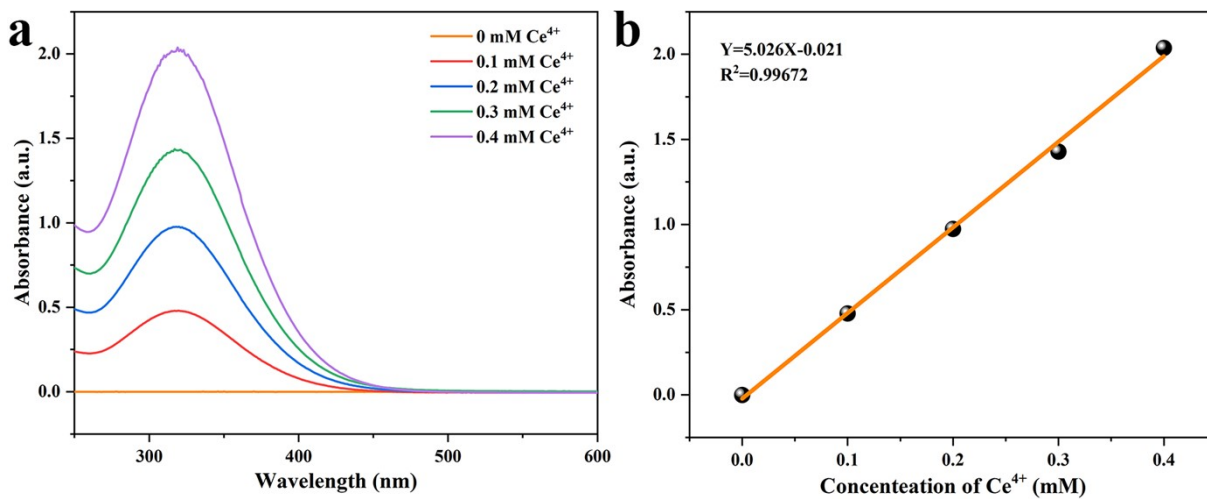

**Fig. S12.** (a) UV-vis spectra of  $\text{Ce}^{4+}$  solution with various concentrations and (b) the corresponding calibration curve.

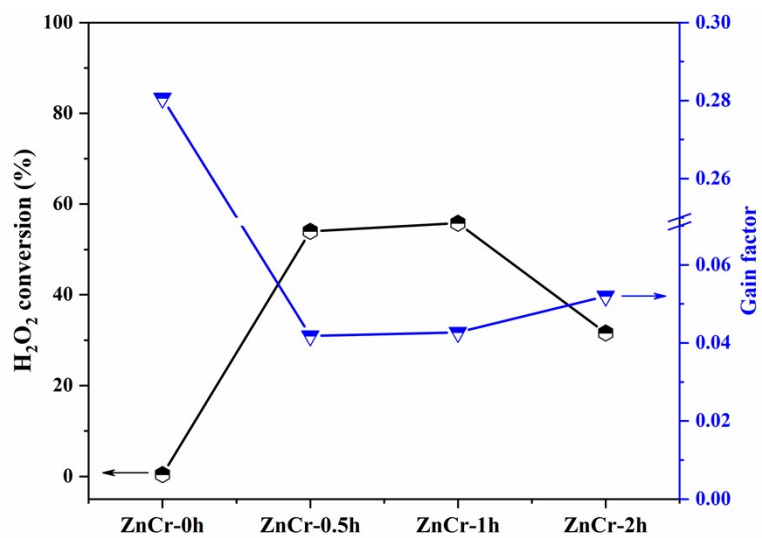

**Fig. S13.** The H<sub>2</sub>O<sub>2</sub> conversion and gain factor over ZnCr-xh.

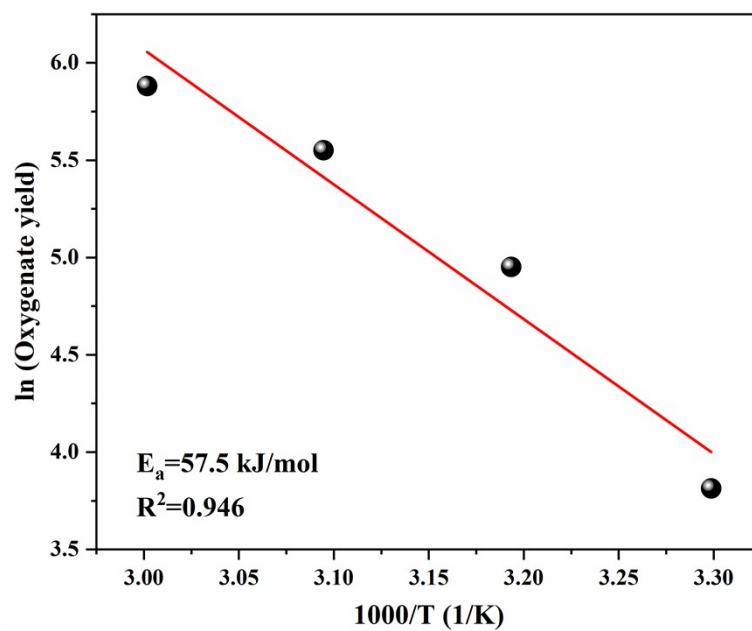

**Fig. S14.** Arrhenius plots of ZnCr-1h with the temperature ranging from 30 to 60 °C.

**Table S3.** The compared catalytic performance of various catalysts.

| Catalyst                                | Reactants                                                                                           | T<br>(°C) | Liquid oxygenates                                                   |                    | Ref.         |
|-----------------------------------------|-----------------------------------------------------------------------------------------------------|-----------|---------------------------------------------------------------------|--------------------|--------------|
|                                         |                                                                                                     |           | Yield rate<br>( $\mu\text{mol g}_{\text{cat}}^{-1} \text{h}^{-1}$ ) | Selectivity<br>(%) |              |
| <b>ZnCr-1h</b>                          | 0.19 M H <sub>2</sub> O <sub>2</sub>                                                                | 50        | 23341<br>(20 bar CH <sub>4</sub> )                                  | 90.5               | This<br>work |
|                                         |                                                                                                     |           | 30695<br>(30 bar CH <sub>4</sub> )                                  | 91.4               |              |
| <b>Cr<sub>1</sub>/TiO<sub>2</sub></b>   | 3 Mpa CH <sub>4</sub><br>0.49 M H <sub>2</sub> O <sub>2</sub>                                       | 50        | 4390                                                                | 100                | [3]          |
| <b>Cu<sub>1</sub>/ZSM-5</b>             | 30 bar CH <sub>4</sub><br>0.51 M H <sub>2</sub> O <sub>2</sub>                                      | 50        | 9600                                                                | 99                 | [4]          |
|                                         |                                                                                                     | 70        | 24000                                                               | 96                 |              |
| <b>CuO-<br/>Pd<sub>1</sub>/ZSM-5</b>    | 30 bar CH <sub>4</sub><br>5 mM H <sub>2</sub> O <sub>2</sub>                                        | 95        | 7882                                                                | 86.5               | [5]          |
| <b>FeN<sub>4</sub>/GN</b>               | 1.8 Mpa CH <sub>4</sub><br>4.90 M H <sub>2</sub> O <sub>2</sub>                                     | 25        | 228                                                                 | 93.7               | [6]          |
| <b>UiO-66-H</b>                         | 3 Mpa CH <sub>4</sub><br>0.25 M H <sub>2</sub> O <sub>2</sub>                                       | 50        | 364                                                                 | 100                | [7]          |
| <b>AuPd colloid</b>                     | 30 bar CH <sub>4</sub><br>0.10 M H <sub>2</sub> O <sub>2</sub>                                      | 50        | 536                                                                 | 94.7               | [8]          |
| <b>FeO<sub>x</sub>/TiO<sub>2</sub></b>  | 70 $\mu\text{mol}$ CH <sub>4</sub><br>8 $\mu\text{mol}$ H <sub>2</sub> O <sub>2</sub>               | light     | 379.4                                                               | 97                 | [9]          |
| <b>ZnO<br/>nanosheets</b>               | 1 bar CH <sub>4</sub><br>0.49M H <sub>2</sub> O <sub>2</sub>                                        | light     | 2210                                                                | 90.7               | [10]         |
| <b>Pd<sub>1</sub>/2DT</b>               | 20 bar CH <sub>4</sub><br>0.10 M H <sub>2</sub> O <sub>2</sub>                                      | light     | 46.3                                                                | 100                | [11]         |
| <b>UiO-66<br/>(2.5TFA)-Fe</b>           | 3 MPa CH <sub>4</sub><br>0.29 M H <sub>2</sub> O <sub>2</sub>                                       | 50        | 4799.2                                                              | 97.9               | [12]         |
| <b>AuPd/TiO<sub>2</sub></b>             | 30.5 bar CH <sub>4</sub><br>0.5 M H <sub>2</sub> O <sub>2</sub>                                     | 90        | 1646                                                                | 88.4               | [13]         |
| <b>AuPd@ZSM-<br/>5-C16</b>              | 3 MPa 3.3% H <sub>2</sub> /<br>6.6 % O <sub>2</sub> /1.6 % CH <sub>4</sub> /<br>61.7 % Ar/26.8 % He | 70        | 4985                                                                | 100                | [14]         |
| <b>Pd<sub>9</sub>Au<sub>1</sub> NWs</b> | 3 MPa 1.1% H <sub>2</sub> /<br>2.2% O <sub>2</sub> /67.2% CH <sub>4</sub> /<br>20.6 % Ar/8.9 % He   | 70        | 2890.3                                                              | 99                 | [15]         |
| <b>PdCu/Z-5</b>                         | 2.4 MPa CH <sub>4</sub><br>0.3 MPa O <sub>2</sub><br>0.8 MPa H <sub>2</sub>                         | 120       | 1649.2                                                              | 95                 | [16]         |
| <b>Rh<sub>1</sub>/ZrO<sub>2</sub></b>   | 30 bar 95% CH <sub>4</sub> /<br>5% He<br>0.5 M H <sub>2</sub> O <sub>2</sub>                        | 70        | 76                                                                  | 78.4               | [17]         |
| <b>Rh<sub>1</sub>/CeO<sub>2</sub></b>   | 0.5 MPa CH <sub>4</sub><br>1 M H <sub>2</sub> O <sub>2</sub>                                        | 50        | 3571.9                                                              | 93.9               | [18]         |

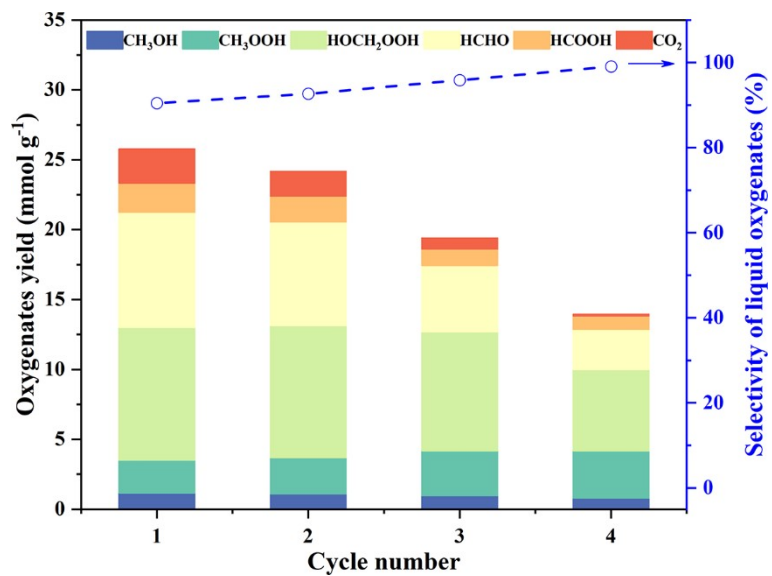

**Fig. S15.** The product yield and liquid oxygenate selectivity for CH<sub>4</sub> oxidation over ZnCr-1h with four consecutive reaction cycles. The ZnCr-1h catalyst after reaction was collected by centrifugation and redispersed in the fresh reaction solution to perform a new cycle with other reaction conditions unchanged.

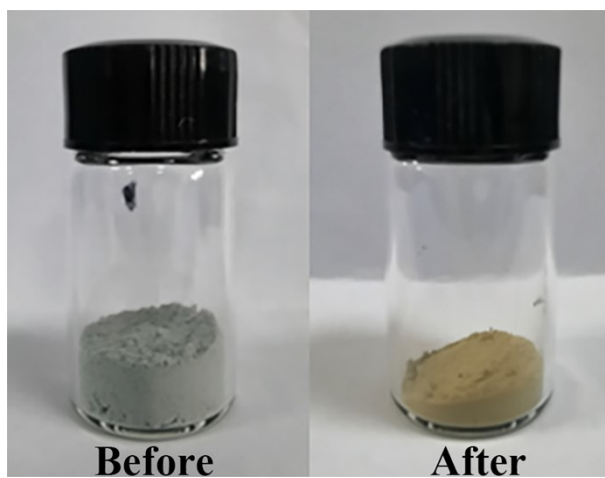

**Fig. S16.** Digital image of ZnCr-1h nanosheets before and after reaction.



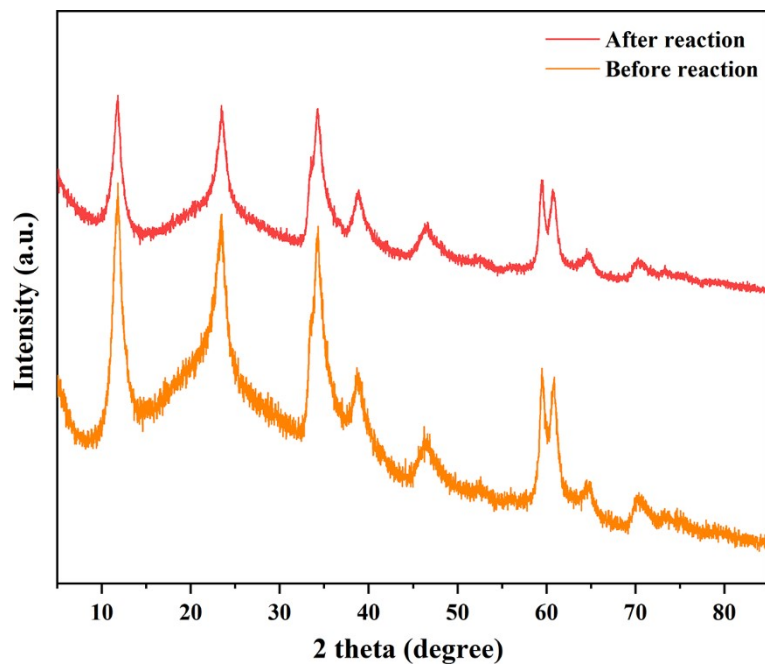

**Fig. S17.** XRD patterns of ZnCr-1h nanosheets before and after reaction.

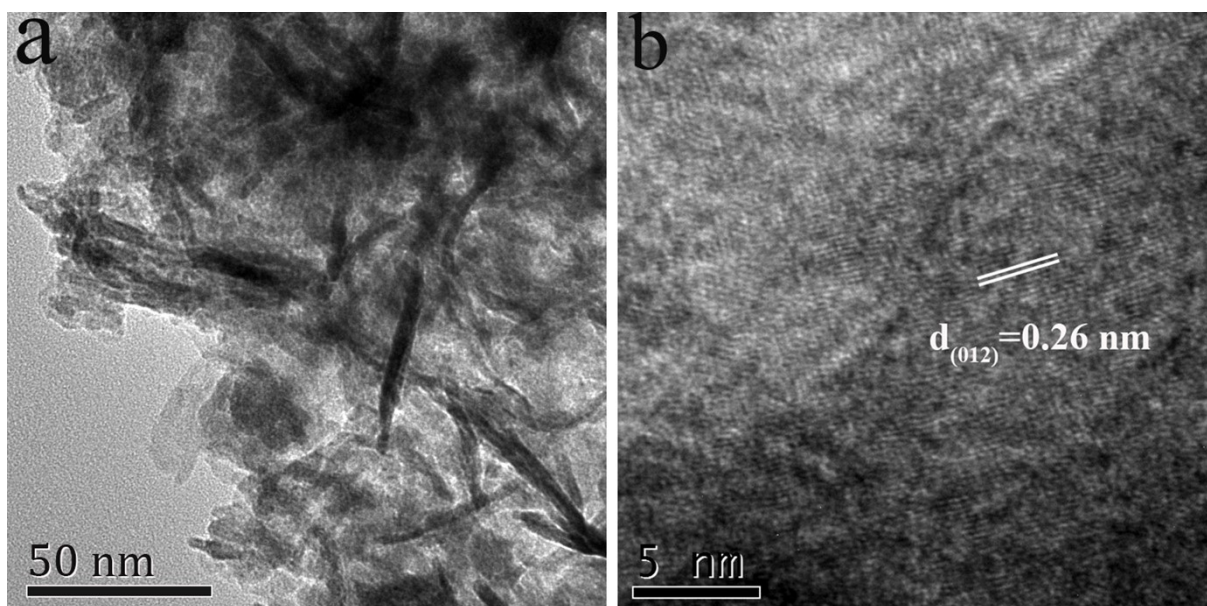

**Fig. S18.** (a) TEM and (b)HRTEM images of ZnCr-1h nanosheets after reaction.

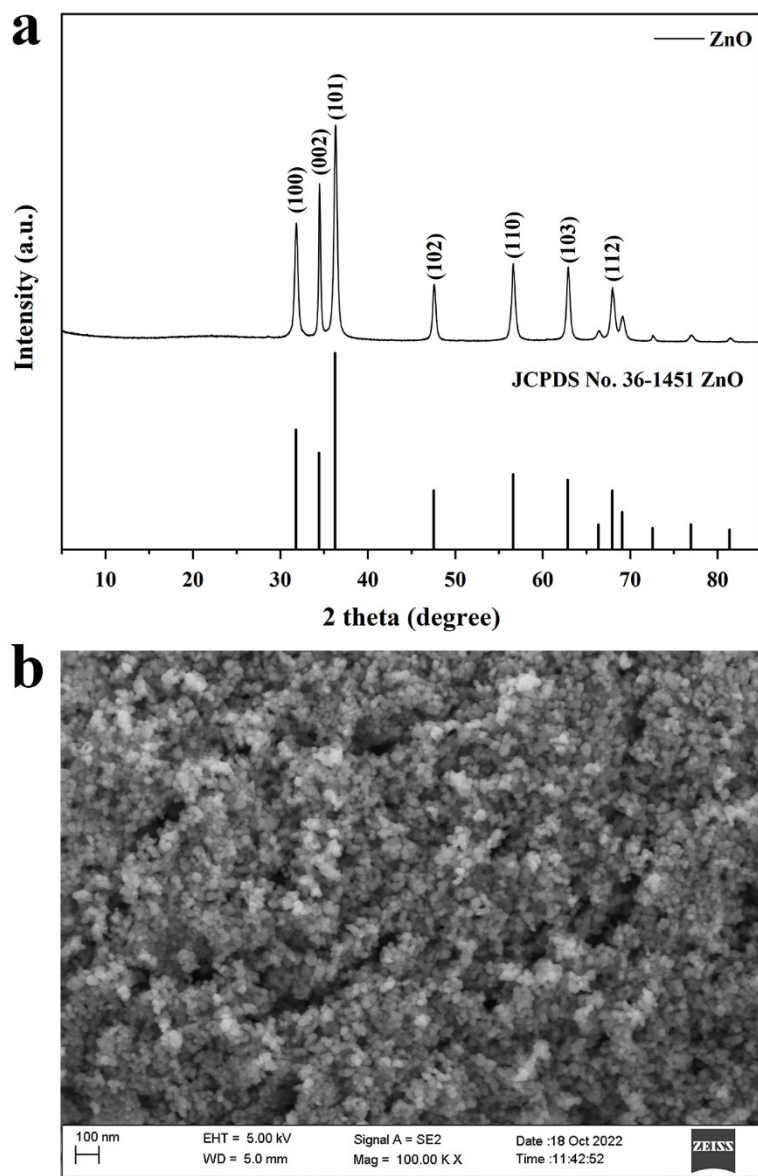

**Fig. S19.** (a) XRD pattern and (b) SEM image of ZnO nanoparticles.

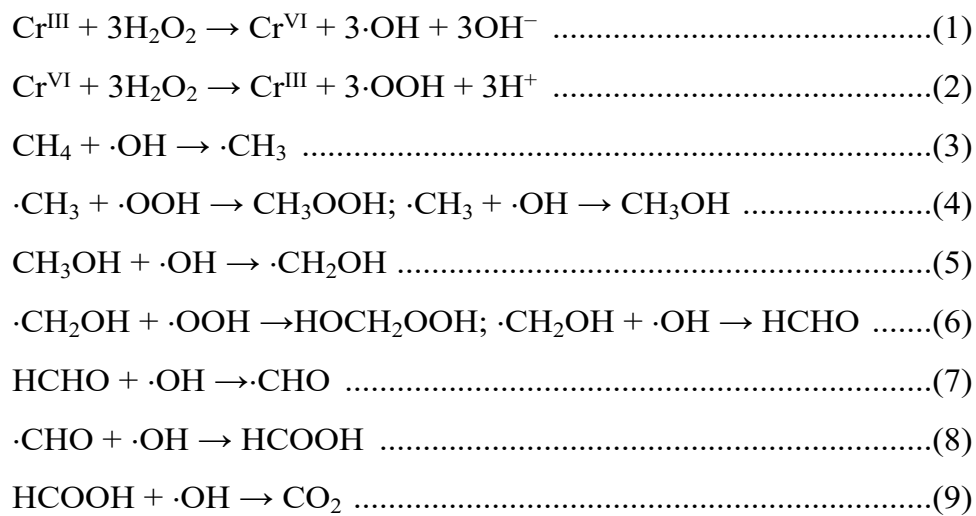

**Fig. S20.** Reaction equations of the consecutive pathway for CH<sub>4</sub> oxidation over etched ZnCr-LDH nanosheets in the presence of H<sub>2</sub>O<sub>2</sub>.

**Table S4.** The data collection for the methane oxidation over ZnCr-xh (x = 0, 0.5, 1 and 2) nanosheets.

| Catalyst         | Entry | Amount of oxygenates ( $\mu\text{mol}$ ) |                     |                       |       |       |                 | Liquid oxygenates ( $\mu\text{mol g}^{-1}$ ) | Liquid oxygenates Selectivity (%) |
|------------------|-------|------------------------------------------|---------------------|-----------------------|-------|-------|-----------------|----------------------------------------------|-----------------------------------|
|                  |       | CH <sub>3</sub> OH                       | CH <sub>3</sub> OOH | HOCH <sub>2</sub> OOH | HCHO  | HCOOH | CO <sub>2</sub> |                                              |                                   |
| <b>ZnCr-0h</b>   | 1     | 0.80                                     | 8.91                | 2.19                  | 0     | 0     | 5.40            | 1190                                         | 68.8                              |
|                  | 2     | 0.64                                     | 8.16                | 1.94                  | 0     | 0     | 5.23            | 1074                                         | 67.3                              |
|                  | 3     | 0.58                                     | 8.11                | 1.64                  | 0     | 0     | 4.20            | 1033                                         | 71.1                              |
|                  | AVG   | 0.67                                     | 8.39                | 1.92                  | 0     | 0     | 4.94            | 1099                                         | 69.0                              |
| <b>ZnCr-0.5h</b> | 4     | 12.04                                    | 23.78               | 96.04                 | 73.86 | 18.07 | 30.09           | 22379                                        | 88.1                              |
|                  | 5     | 12.90                                    | 24.71               | 93.37                 | 77.91 | 16.64 | 25.32           | 22553                                        | 89.9                              |
|                  | 6     | 9.38                                     | 20.30               | 88.24                 | 79.38 | 16.57 | 22.84           | 21387                                        | 90.4                              |
|                  | AVG   | 11.44                                    | 22.93               | 92.55                 | 77.05 | 17.09 | 26.08           | 22106                                        | 89.5                              |
| <b>ZnCr-1h</b>   | 7     | 12.04                                    | 23.47               | 86.73                 | 76.44 | 19.53 | 25.23           | 21821                                        | 89.6                              |
|                  | 8     | 9.60                                     | 22.99               | 96.46                 | 76.81 | 19.67 | 21.53           | 22553                                        | 91.3                              |
|                  | 9     | 13.33                                    | 24.13               | 101.82                | 93.74 | 23.47 | 26.25           | 25649                                        | 90.7                              |
|                  | AVG   | 11.66                                    | 23.53               | 95.00                 | 82.33 | 20.89 | 24.34           | 23341                                        | 90.5                              |
| <b>ZnCr-2h</b>   | 10    | 9.69                                     | 36.34               | 69.60                 | 38.51 | 12.14 | 13.92           | 16628                                        | 92.3                              |
|                  | 11    | 6.81                                     | 32.56               | 65.93                 | 38.70 | 9.93  | 12.41           | 15393                                        | 92.5                              |
|                  | 12    | 9.34                                     | 35.70               | 74.51                 | 32.99 | 12.20 | 9.06            | 16474                                        | 94.8                              |
|                  | AVG   | 8.61                                     | 34.87               | 70.01                 | 36.73 | 11.42 | 11.80           | 16165                                        | 93.2                              |

**Table S5.** The data collection for the methane oxidation over ZnCr-1h with different methane pressure.

| Methane pressure (bar) | Entry | Amount of oxygenates ( $\mu\text{mol}$ ) |                     |                       |        |       |                 | Liquid oxygenates ( $\mu\text{mol g}^{-1}$ ) | Liquid oxygenates Selectivity (%) |
|------------------------|-------|------------------------------------------|---------------------|-----------------------|--------|-------|-----------------|----------------------------------------------|-----------------------------------|
|                        |       | CH <sub>3</sub> OH                       | CH <sub>3</sub> OOH | HOCH <sub>2</sub> OOH | HCHO   | HCOOH | CO <sub>2</sub> |                                              |                                   |
| 0                      | 1     | 0                                        | 0                   | 0                     | 0      | 0     | 0               | 0                                            | 0                                 |
|                        | 2     | 4.86                                     | 19.52               | 57.61                 | 31.70  | 11.11 | 7.74            | 12480                                        | 94.2                              |
|                        | 3     | 4.64                                     | 17.76               | 47.29                 | 28.57  | 8.12  | 6.62            | 10638                                        | 94.1                              |
|                        | 4     | 5.27                                     | 19.51               | 53.35                 | 26.92  | 8.42  | 7.25            | 11347                                        | 94.0                              |
|                        | AVG   | 4.92                                     | 18.93               | 52.75                 | 29.06  | 9.22  | 7.20            | 11488                                        | 94.1                              |
| 20                     | 5     | 12.04                                    | 23.47               | 86.73                 | 76.44  | 19.53 | 25.23           | 21821                                        | 89.6                              |
|                        | 6     | 9.60                                     | 22.99               | 96.46                 | 76.81  | 19.67 | 21.53           | 22553                                        | 91.3                              |
|                        | 7     | 13.33                                    | 24.13               | 101.82                | 93.74  | 23.47 | 26.25           | 25649                                        | 90.7                              |
|                        | AVG   | 11.66                                    | 23.53               | 95.00                 | 82.33  | 20.89 | 24.34           | 23341                                        | 90.5                              |
| 30                     | 8     | 17.83                                    | 31.22               | 114.52                | 110.00 | 23.22 | 33.93           | 29679                                        | 89.7                              |
|                        | 9     | 16.35                                    | 32.81               | 136.66                | 102.95 | 26.91 | 26.39           | 31568                                        | 92.3                              |
|                        | 10    | 14.35                                    | 31.31               | 147.69                | 86.75  | 28.27 | 26.09           | 30837                                        | 92.2                              |
|                        | AVG   | 16.18                                    | 31.78               | 132.96                | 99.90  | 26.13 | 28.80           | 30695                                        | 91.4                              |

**Table S6.** The data collection for the methane oxidation over ZnCr-1h with different amount of H<sub>2</sub>O<sub>2</sub>.

| Amount of H <sub>2</sub> O <sub>2</sub> (mL) | Entry | Amount of oxygenates (μmol) |                     |                       |        |       |                 | Liquid oxygenates (μmol g <sup>-1</sup> ) | Liquid oxygenates Selectivity (%) |
|----------------------------------------------|-------|-----------------------------|---------------------|-----------------------|--------|-------|-----------------|-------------------------------------------|-----------------------------------|
|                                              |       | CH <sub>3</sub> OH          | CH <sub>3</sub> OOH | HOCH <sub>2</sub> OOH | HCHO   | HCOOH | CO <sub>2</sub> |                                           |                                   |
| 0                                            | 1     | 0                           | 0                   | 0                     | 0      | 0     | 0               | 0                                         | 0                                 |
| 0.5                                          | 2     | 5.72                        | 15.34               | 29.74                 | 21.00  | 4.57  | 4.29            | 7637                                      | 94.7                              |
|                                              | 3     | 5.20                        | 14.25               | 28.99                 | 16.79  | 4.89  | 3.99            | 7012                                      | 94.6                              |
|                                              | 4     | 6.07                        | 16.81               | 36.27                 | 19.36  | 5.67  | 4.00            | 8418                                      | 95.5                              |
|                                              | AVG   | 5.66                        | 15.47               | 31.67                 | 19.05  | 5.04  | 4.09            | 7689                                      | 94.9                              |
| 1                                            | 5     | 12.04                       | 23.47               | 86.73                 | 76.44  | 19.53 | 25.23           | 21821                                     | 89.6                              |
|                                              | 6     | 9.60                        | 22.99               | 96.46                 | 76.81  | 19.67 | 21.53           | 22553                                     | 91.3                              |
|                                              | 7     | 13.33                       | 24.13               | 101.82                | 93.74  | 23.47 | 26.25           | 25649                                     | 90.7                              |
|                                              | AVG   | 11.66                       | 23.53               | 95.00                 | 82.33  | 20.89 | 24.34           | 23341                                     | 90.5                              |
| 2                                            | 8     | 11.71                       | 23.45               | 139.36                | 120.07 | 25.79 | 91.70           | 32038                                     | 77.7                              |
|                                              | 9     | 11.92                       | 22.91               | 131.54                | 117.30 | 25.07 | 96.74           | 30874                                     | 76.1                              |
|                                              | 10    | 13.16                       | 27.02               | 145.54                | 100.37 | 30.62 | 98.38           | 31671                                     | 76.3                              |
|                                              | AVG   | 12.26                       | 24.46               | 138.81                | 112.58 | 27.16 | 95.61           | 31528                                     | 76.7                              |

**Table S7.** The data collection for the methane oxidation over ZnCr-1h with different temperature.

| Temp<br>(°C) | Entry | Amount of oxygenates ( $\mu\text{mol}$ ) |                     |                       |        |       |                 | Liquid<br>oxygenates<br>( $\mu\text{mol g}^{-1}$ ) | Liquid<br>oxygenates<br>Selectivity (%) |
|--------------|-------|------------------------------------------|---------------------|-----------------------|--------|-------|-----------------|----------------------------------------------------|-----------------------------------------|
|              |       | CH <sub>3</sub> OH                       | CH <sub>3</sub> OOH | HOCH <sub>2</sub> OOH | HCHO   | HCOOH | CO <sub>2</sub> |                                                    |                                         |
| 30           | 1     | 4.06                                     | 16.03               | 18.08                 | 4.64   | 3.26  | 0.52            | 4607                                               | 98.9                                    |
|              | 2     | 3.66                                     | 11.82               | 26.84                 | 5.03   | 4.36  | 1.51            | 5171                                               | 97.2                                    |
|              | 3     | 2.58                                     | 11.33               | 16.09                 | 3.32   | 2.50  | 0.42            | 3582                                               | 98.8                                    |
|              | AVG   | 3.43                                     | 13.06               | 20.34                 | 4.33   | 3.37  | 0.82            | 4453                                               | 98.3                                    |
| 40           | 4     | 10.28                                    | 26.78               | 61.38                 | 35.38  | 10.47 | 2.62            | 14429                                              | 98.2                                    |
|              | 5     | 9.31                                     | 27.56               | 61.55                 | 28.20  | 8.52  | 2.77            | 13514                                              | 98.0                                    |
|              | 6     | 8.52                                     | 28.81               | 64.62                 | 20.29  | 10.51 | 6.89            | 13275                                              | 95.1                                    |
|              | AVG   | 9.37                                     | 27.72               | 62.52                 | 27.96  | 9.83  | 4.09            | 13739                                              | 97.1                                    |
| 50           | 7     | 12.04                                    | 23.47               | 86.73                 | 76.44  | 19.53 | 25.23           | 21821                                              | 89.6                                    |
|              | 8     | 9.60                                     | 22.99               | 96.46                 | 76.81  | 19.67 | 21.53           | 22553                                              | 91.3                                    |
|              | 9     | 13.33                                    | 24.13               | 101.82                | 93.74  | 23.47 | 26.25           | 25649                                              | 90.7                                    |
|              | AVG   | 11.66                                    | 23.53               | 95.00                 | 82.33  | 20.89 | 24.34           | 23341                                              | 90.5                                    |
| 60           | 10    | 12.54                                    | 16.47               | 57.51                 | 111.05 | 25.32 | 129.84          | 22289                                              | 63.2                                    |
|              | 11    | 13.82                                    | 19.10               | 77.07                 | 121.54 | 27.99 | 115.82          | 25952                                              | 69.1                                    |
|              | 12    | 12.13                                    | 16.52               | 61.74                 | 106.44 | 30.24 | 120.31          | 22707                                              | 65.4                                    |
|              | AVG   | 12.83                                    | 17.36               | 65.44                 | 113.01 | 27.85 | 121.99          | 23649                                              | 65.9                                    |



**Table S8.** The data collection for the methane oxidation over ZnCr-1h with different reaction time.

| Reaction time (h) | Entry | Amount of oxygenates ( $\mu\text{mol}$ ) |                     |                       |        |       |                 | Liquid oxygenates ( $\mu\text{mol g}^{-1}$ ) | Liquid oxygenates Selectivity (%) |
|-------------------|-------|------------------------------------------|---------------------|-----------------------|--------|-------|-----------------|----------------------------------------------|-----------------------------------|
|                   |       | CH <sub>3</sub> OH                       | CH <sub>3</sub> OOH | HOCH <sub>2</sub> OOH | HCHO   | HCOOH | CO <sub>2</sub> |                                              |                                   |
| 0.5               | 1     | 6.76                                     | 26.15               | 44.63                 | 19.18  | 8.27  | 9.13            | 10499                                        | 92.0                              |
|                   | 2     | 5.25                                     | 24.77               | 66.77                 | 21.58  | 10.13 | 6.57            | 12850                                        | 95.1                              |
|                   | 3     | 6.71                                     | 25.43               | 72.44                 | 26.73  | 11.63 | 8.47            | 14294                                        | 94.4                              |
|                   | AVG   | 6.24                                     | 25.45               | 61.28                 | 22.50  | 10.01 | 8.06            | 12548                                        | 94.0                              |
| 1                 | 4     | 12.04                                    | 23.47               | 86.73                 | 76.44  | 19.53 | 25.23           | 21821                                        | 89.6                              |
|                   | 5     | 9.60                                     | 22.99               | 96.46                 | 76.81  | 19.67 | 21.53           | 22553                                        | 91.3                              |
|                   | 6     | 13.33                                    | 24.13               | 101.82                | 93.74  | 23.47 | 26.25           | 25649                                        | 90.7                              |
|                   | AVG   | 11.66                                    | 23.53               | 95.00                 | 82.33  | 20.89 | 24.34           | 23341                                        | 90.5                              |
| 2                 | 7     | 14.15                                    | 16.14               | 53.91                 | 103.32 | 29.56 | 135.96          | 21708                                        | 61.5                              |
|                   | 8     | 12.96                                    | 15.38               | 53.17                 | 100.55 | 27.59 | 134.17          | 20965                                        | 61.0                              |
|                   | 9     | 15.18                                    | 18.76               | 61.05                 | 109.39 | 31.42 | 135.19          | 23580                                        | 63.6                              |
|                   | AVG   | 14.10                                    | 16.76               | 56.04                 | 104.42 | 29.52 | 135.11          | 22084                                        | 62.0                              |

## Reference

1. P. Bisgaard, L. MØlhave, B. Rietz and P. Wilhardt, *Anal. Lett.*, 1983, **16**, 1457-1468.
2. F. F. Zhang, Y. L. Zhu, C. Tang, Y. Chen, B. B. Qian, Z. W. Hu, Y. C. Chang, C. W. Pao, Q. Lin, S. A. Kazemi, Y. Wang, L. Zhang, X. W. Zhang and H. T. Wang, *Adv. Funct. Mater.*, 2022, **32**, 2110224.
3. Q. K. Shen, C. Y. Cao, R. K. Huang, L. Zhu, X. Zhou, Q. H. Zhang, L. Gu and W. G. Song, *Angew. Chem., Int. Ed.*, 2020, **59**, 1216-1219.
4. X. Tang, L. Wang, B. Yang, C. Fei, T. Y. Yao, W. Liu, Y. Lou, Q. G. Dai, Y. F. Cai, X. M. Cao, W. C. Zhan, Y. L. Guo, X. Q. Gong and Y. Guo, *Appl. Catal., B*, 2021, **285**, 119827.
5. W. X. Huang, S. R. Zhang, Y. Tang, Y. T. Li, L. Nguyen, Y. Y. Li, J. J. Shan, D. Q. Xiao, R. Gagne, A. I. Frenkel and F. Tao, *Angew. Chem., Int. Ed.*, 2016, **55**, 13441-13445.
6. X. J. Cui, H. B. Li, Y. Wang, Y. L. Hu, L. Hua, H. Y. Li, X. W. Han, Q. F. Liu, F. Yang, L. M. He, X. Q. Chen, Q. Y. Li, J. P. Xiao, D. H. Deng and X. H. Bao, *Chem*, 2018, **4**, 1902-1910.
7. G. Q. Fang, J. N. Hu, L. C. Tian, J. X. Liang, J. Lin, L. Li, C. Zhu and X. D. Wang, *Angew. Chem., Int. Ed.*, 2022, **61**, e202205077.
8. N. Agarwal, S. J. Freakley, R. U. McVicker, S. M. Althahban, N. Dimitratos, Q. He, D. J. Morgan, R. L. Jenkins, D. J. Willock, S. H. Taylor, C. J. Kiely and G. J. Hutchings, *Science*, 2017, **358**, 223-227.
9. J. J. Xie, R. X. Jin, A. Li, Y. P. Bi, Q. S. Ruan, Y. C. Deng, Y. J. Zhang, S. Y. Yao, G. Sankar, D. Ma and J. W. Tang, *Nat. Catal.*, 2018, **1**, 889-896.
10. S. Zhu, X. D. Li, Z. K. Pan, X. C. Jiao, K. Zheng, L. Li, W. W. Shao, X. L. Zu, J. Hu, J. F. Zhu, Y. F. Sun and Y. Xie, *Nano Lett.*, 2021, **21**, 4122-4128.
11. X. Y. Wu, Q. Zhang, W. F. Li, B. T. Qiao, D. Ma and S. L. Wang, *ACS Catal.*, 2021, **11**, 14038-14046.
12. W. S. Zhao, Y. N. Shi, Y. H. Jiang, X. F. Zhang, C. Long, P. F. An, Y. F. Zhu, S. X. Shao, Z. Yan, G. D. Li and Z. Y. Tang, *Angew. Chem., Int. Ed.*, 2021, **60**, 5811-5815.
13. M. H. Ab Rahim, M. M. Forde, R. L. Jenkins, C. Hammond, Q. He, N. Dimitratos, J. A. Lopez-Sanchez, A. F. Carley, S. H. Taylor, D. J. Willock, D. M. Murphy, C. J. Kiely and G. J. Hutchings, *Angew. Chem., Int. Ed.*, 2013, **52**, 1280-1284.
14. Z. Jin, L. Wang, E. Zuidema, K. Mondal, M. Zhang, J. Zhang, C. T. Wang, X. J. Meng, H. Q. Yang, C. Mesters and F. S. Xiao, *Science*, 2020, **367**, 193-197.
15. Y. S. Xu, D. X. Wu, P. L. Deng, J. Li, J. M. Luo, Q. Chen, W. Huang, C. M. Shim, C. M. Jia, Z. X. Liu, Y. J. Shen and X. L. Tian, *Appl. Catal., B*, 2022, **308**, 121223.
16. B. Wu, T. J. Lin, M. Huang, S. G. Li, J. Li, X. Yu, R. O. Yang, F. F. Sun, Z. Jiang, Y. H. Sun and L. S. Zhong, *Angew. Chem., Int. Ed.*, 2022, **61**, e202204116.
17. Y. Kwon, T. Y. Kim, G. Kwon, J. Yi and H. Lee, *J. Am. Chem. Soc.*, 2017, **139**, 17694-17699.

18. S. X. Bai, F. F. Liu, B. L. Huang, F. Li, H. P. Lin, T. Wu, M. Z. Sun, J. B. Wu, Q. Shao, Y. Xu and X. Q. Huang, *Nat. Commun.*, 2020, **11**, 954.
